# Supplementary material for: Bacterial diversity among four healthcare-associated institutes in Taiwan
Source: PubMed Central journal article supplement (PMC5557925; doi:10.1038/s41598-017-08679-3), 2017-08-15
Supplement: 41598_2017_8679_MOESM1_ESM.pdf [file 41598_2017_8679_MOESM1_ESM.pdf]

Title: Bacterial diversity among four healthcare-associated institutes in Taiwan  
Authors: Chang-Hua Chen, Yaw-Ling Lin, Kuan-Hsueh Chen, Wen-Pei Chen,  
Zhao-Feng Chen, Han-Yueh Kuo, Hsueh-Fen Hung, Chuan Yi Tang, Ming-Li Liou

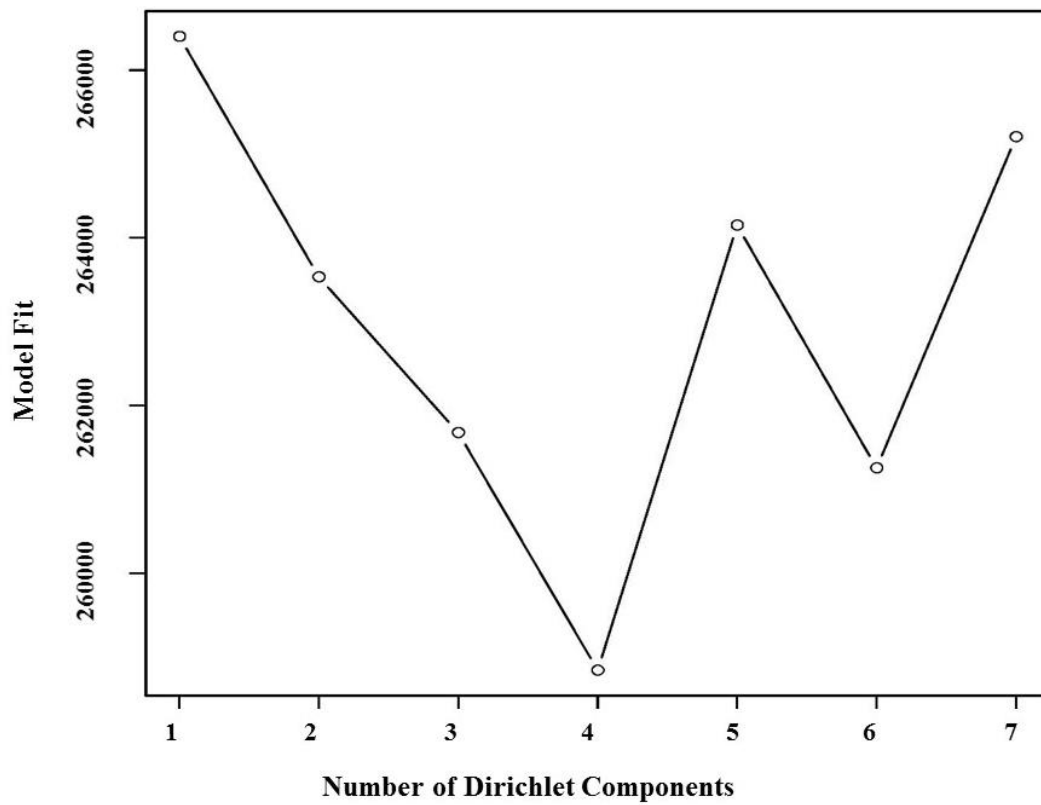

Figure S1.  
Fitting the OTUs data from 203 environmental samples to DMM provided support four types when using the Laplace approximation to the negative log model evidence.
